# Supplementary material for: A post-wildfire response in cave dripwater chemistry
Source: Copernicus journal article supplement (doi:10.5194/hess-2016-1), 2016-01-19
Supplement: Supplementary file 1 [file DR_Geol_Tables.xlsx]

## Sheet: DR1 Table 1A) Site1a
Site 1A Yanchep Data
																															PCP	PCP
Date collected	Anion Code	Cation - Code	H2	Dilution Factor (by weight)	Ba (mg/L)	Ca (mg/L)	K (mg/L)	Mg (mg/L)	Na (mg/L)	S (mg/L)	Sr (mg/L)	Cl-(mg/L)	SO42-(mg/L)	NO3-(mg/L)	Bottle fraction (1L)	Drip Rate (min/drop)	pH	Ba (mol/L)	Ca (mmol/L)	K (mmol/L)	Mg (mmol/L)	Na (mmol/L)	S (mmol/L)	Sr (mmol/L)	Mg/Ca	Sr/Ca	Sr/Mg	Cl (mmol/L)	SO4 (mmol/L)	NO3 (mmol/L)	log_Mg/ca	log_Sr/ca
2005-08-19		YD-23		1.03627	0.066	80.1	6.4	13.33	184	6.4	0.863							0.000480605	1.9986	0.163691	0.548447	8.00383	0.199626	0.00984935	0.274415	0.00492812	0.0179586				-0.561592	-2.30732
2005-09-01		YD-1		1.02785	0.073	84.3	6.3	13.23	190	6.5	0.858				0.5	12.38		0.000531578	2.1034	0.161134	0.544332	8.26482	0.202745	0.00979228	0.258787	0.00465546	0.0179895				-0.587057	-2.33204
2005-10-03		YD-3		1.0278	0.029	83.5	6.2	13.03	190	6.7	0.845				1	12.52		0.000211175	2.08344	0.158576	0.536104	8.26482	0.208983	0.00964392	0.257317	0.00462885	0.0179889				-0.589532	-2.33453
2005-11-02		YD-5		1.02806	0.02	79.2	6	12.7	190	6.6	0.825				1	13.18		0.000145638	1.97615	0.153461	0.522526	8.26482	0.205864	0.00941566	0.264417	0.00476466	0.0180195				-0.577711	-2.32197
2005-12-02		YD-7		1.02836	0.029	78.9	6.1	12.58	187	6.6	0.819				1	17.28		0.000211175	1.96866	0.156018	0.517589	8.13433	0.205864	0.00934718	0.262914	0.00474799	0.0180591				-0.580186	-2.32349
2006-01-04	YD-30	YD-29		1.02549	0.029	72	6.2	12.42	186	6.8	0.807				1	18.1		0.000211175	1.7965	0.158576	0.511006	8.09083	0.212102	0.00921023	0.284446	0.00512677	0.0180237				-0.546	-2.29016
2006-02-01		YD-9		1.02563	0.027	71.2	6.5	12.53	186	6.9	0.816	329	19.5		0.8	12.36		0.000196611	1.77654	0.166249	0.515532	8.09083	0.215221	0.00931294	0.290189	0.00524219	0.0180647	9.28068			-0.537319	-2.28049
2006-02-28		YD-11		1.02071	0.028	67.9	6	12.13	191	7.1	0.792				0.75	16.31		0.000203893	1.6942	0.153461	0.499074	8.30832	0.22146	0.00903903	0.294579	0.00533529	0.0181116				-0.530799	-2.27284
2006-04-04		YD-14		1.01915	0.021	64.9	6.2	12.19	196	7.4	0.795				0.5	17.2		0.00015292	1.61934	0.158576	0.501543	8.52582	0.230817	0.00907327	0.30972	0.00560306	0.0180907				-0.509031	-2.25157
2006-05-03		YD-15		1.0277	0.021	55.5	6.8	11.91	190	7.3	0.762				0.75	18.3		0.00015292	1.3848	0.173922	0.490023	8.26482	0.227698	0.00869664	0.353858	0.00628007	0.0177474				-0.451171	-2.20204
2006-05-31	YD-17	YD-18		1.02103	0.027	47.9	6.6	11.97	189	7.8	0.754	321.114	23.1569	2.67078				0.000196611	1.19517	0.168807	0.492491	8.22132	0.243294	0.00860534	0.412068	0.0072001	0.0174731	9.05821	0.241077	0.0430744	-0.385031	-2.14266
2006-07-05	YD-32	YD-24		1.02434	0.021	51.6	6.2	11.64	186	7.7	0.734	311.433	23.251	2.71288		6.22	7.7	0.00015292	1.28749	0.158576	0.478914	8.09083	0.240175	0.00837708	0.371975	0.00650653	0.0174918	8.78514	0.242057	0.0437533	-0.429486	-2.18665
2006-08-02	YD-35	YD-34		1.02253	0.024	46.2	6.1	11.33	186	7.8	0.707	300.47	23.5497	45.3312		8.41	7.4	0.000174765	1.15275	0.156018	0.466159	8.09083	0.243294	0.00806893	0.404388	0.00699971	0.0173094	8.47588	0.245167	0.731101	-0.393202	-2.15492
2006-09-05	YD-57	YD-40		1.0219	0.024	45.8	5.8	10.91	185	7.7	0.678	294	23	3.3		8.42	7.4	0.000174765	1.14277	0.148345	0.448879	8.04733	0.240175	0.00773796	0.392798	0.00677122	0.0172384	8.29337	0.239444	0.0532224	-0.40583	-2.16933
2006-10-03		YD-39		1.01915	0.024	44.4	5.9	10.88	179	7.8	0.672	273.734				9.22	7.4	0.000174765	1.10784	0.150903	0.447645	7.78633	0.243294	0.00766948	0.40407	0.00692292	0.017133	7.72168			-0.393544	-2.15971
2006-10-31	YD-43	YD-44		1.01846	0.019	46.8	5.7	10.74	183	7.9	0.659	283	24	4.2	0.333333	10.04	7.4	0.000138356	1.16772	0.145788	0.441884	7.96033	0.246413	0.00752111	0.378415	0.00644084	0.0170205	7.98307	0.249854	0.0677376	-0.422031	-2.19106
2006-11-30	YD-45	YD-42		1.02301	0.026	45.7	5.8	10.61	176	7.9	0.651	265.821	22.1908	3.97779	0.333333	10.04	7.4	0.000189329	1.14028	0.148345	0.436536	7.65584	0.246413	0.00742981	0.382833	0.0065158	0.0170199	7.49848	0.231019	0.0641537	-0.41699	-2.18603
2007-01-03	YD-50	YD-52		1.02219	0.022	47.4	5.7	10.39	176	7.8	0.643	260.575	22.2859	4.39395	0.3	10.2	7.4	0.000160202	1.18269	0.145788	0.427484	7.65584	0.243294	0.00733851	0.361449	0.00620491	0.0171667	7.35049	0.23201	0.0708655	-0.441952	-2.20726
2007-02-06		YD-76		1.02087	0.019	45.7	5.6	10.41	176	8	0.641	258.997			0.3			0.000138356	1.14028	0.14323	0.428307	7.65584	0.249532	0.00731568	0.375617	0.00641571	0.0170805	7.30598			-0.425255	-2.19276
2007-03-02	YD-51	YD-53		1.02185	0.022	32.4	5.9	10.51	179	8.2	0.629	279	25	4.7	0.25		7.4	0.000160202	0.808424	0.150903	0.432421	7.78633	0.25577	0.00717873	0.534894	0.00887991	0.0166012	7.87024	0.260265	0.0758016	-0.271732	-2.05159
2007-04-04	YD-56	YD-61		1.01714	0.023	28.7	6.3	10.76	182	8.6	0.644	281	25	4.4	0.166667		7.4	0.000167483	0.716104	0.161134	0.442707	7.91683	0.268247	0.00734992	0.618217	0.0102638	0.0166022	7.92666	0.260265	0.0709632	-0.208859	-1.98869
2007-05-02	YD-63	YD-66		1.02911								289	26	11.7	0.166667			0	0	0	0	0	0	0			0	8.15233	0.270675	0.188698
2007-06-01	YD-68	YD-67		1.02698	0.025	27.9	6.5	10.62	187	8.6	0.613	294	27	5.7	0.125			0.000182047	0.696143	0.166249	0.436947	8.13433	0.268247	0.00699612	0.627669	0.0100498	0.0160114	8.29337	0.281086	0.0919296	-0.202269	-1.99784
2007-07-02		YD-81		1.01733	0.024	28.8	7	11.15	202	9.1	0.63				0			0.000174765	0.718599	0.179037	0.458753	8.78681	0.283843	0.00719014	0.6384	0.0100058	0.0156732				-0.194907	-1.99975
2007-08-06															0	Dry	Dry	0	0		0	0	0	0
															0
2007-10-03															0	Dry	Dry
2007-11-02																Dry	Dry
																			1.18269	0.157297	0.466159			0.00806893				8.0677	0.245167
																			0.585065	0.0334155	0.138179			0.00249593				0.605662	0.0160163

## Sheet: DR Table 1B) Site 2a
Site 2A Yanchep Data
																																PCP	PCP
Date collected	Anion-code	Cation-Code	Dilution Factor (by weight)	Ba (mg/L)	Ca (mg/L)	Fe (mg/L)	K (mg/L)	Mg (mg/L)	Na (mg/L)	S (mg/L)	Sr (mg/L)	Cl-(mg/L)	SO42-(mg/L)	NO3-(mg/L)	Bottle lvl (fraction of ~500ml)	Drip Rate (m/drop)	pH	H2	Ba (mmol/L	Ca (mmol/L)	K (mmol/L)	Mg (mmol/L)	Na (mmol/L)	S (mmol/L)	Sr (mmol/L)	Mg/Ca	Sr/Ca	Mg/Sr	Cl-(mg/L)	SO42-(mg/L)	NO3-(mg/L)	ln_Mg/Ca	ln_Sr/Ca
2005-09-01		YD-2	1.02766	0.041	48.7	<0.003	1.6	7.1	56.9	3.3	0.382				0.5				0.000298557	1.21513	0.0409228	0.292121	2.4751	0.102932	0.00435974	0.240403	0.00358787	67.0043				-0.61906	-2.44516
2005-10-03		YD-4	1.02818	0.024	47.9	<0.003	1.6	7.31	60.9	3.4	0.393				0.75				0.000174765	1.19517	0.0409228	0.300761	2.64909	0.106051	0.00448528	0.251647	0.00375284	67.0552				-0.599208	-2.42564
2005-11-02		YD-6	1.02755	0.01	45.1	<0.003	1.6	7.16	58.4	3.3	0.389				0.8				7.28189e-05	1.12531	0.0409228	0.29459	2.54035	0.102932	0.00443963	0.261786	0.00394526	66.3546				-0.582053	-2.40392
2005-12-02		YD-8	1.02749	0.025	47.1	<0.003	1.6	7.12	59.6	3.3	0.39				0.5				0.000182047	1.17521	0.0409228	0.292944	2.59254	0.102932	0.00445104	0.24927	0.00378745	65.8147				-0.60333	-2.42165
2006-01-04		YD-28	1.02473	0.024	48.7	<0.003	1.5	7.31	60.2	3.5	0.39				0.75				0.000174765	1.21513	0.0383651	0.300761	2.61864	0.10917	0.00445104	0.247513	0.00366301	67.571				-0.606401	-2.43616
2006-02-01		YD-10	1.02535	0.029	57.4	<0.003	1.6	7.3	61.4	3.4	0.394				0.5				0.000211175	1.43221	0.0409228	0.30035	2.67084	0.106051	0.00449669	0.209711	0.00313969	66.7935				-0.678379	-2.50311
2006-02-28		YD-12	1.02159	0.024	58.5	<0.003	1.5	7.54	60.8	3.5	0.394				0.5				0.000174765	1.45965	0.0383651	0.310224	2.64474	0.10917	0.00449669	0.212533	0.00308066	68.9895				-0.672574	-2.51136
2006-04-04		YD-13	1.01963	0.011	50.2	<0.003	1.6	7.66	64	3.7	0.399				0.8				8.01008e-05	1.25256	0.0409228	0.315161	2.78394	0.115409	0.00455375	0.251614	0.00363557	69.2091				-0.599265	-2.43943
2006-05-03		YD-16	1.01972	0.021	45.3	<0.003	1.8	7.96	68	4	0.408				0.3				0.00015292	1.1303	0.0460382	0.327505	2.95794	0.124766	0.00465647	0.289751	0.00411969	70.3332				-0.537975	-2.38514
2006-05-31		YD-21	1.03382	0.032	45.8	<0.003	1.7	8.37	70	3.9	0.421	144	10.6						0.00023302	1.14277	0.0434805	0.344374	3.04493	0.121647	0.00480484	0.301349	0.00420455	71.6722	4.06206	0.110352		-0.52093	-2.37628
2006-07-05		YD-33	1.02358	0.026	47.9	<0.003	1.7	8.39	70.2	4.1	0.42	151	11.3			21.35	7.4		0.000189329	1.19517	0.0434805	0.345196	3.05363	0.127885	0.00479343	0.288826	0.00401067	72.0146	4.25952	0.11764		-0.539363	-2.39678
2006-08-02		YD-XA	1.01677													20.18	7.1											71.7579
2006-09-05	YD-37	YD-31	1.02139	0.027	47.9	<0.003	1.7	8.38	68.8	4.1	0.421	153	12	3.3	0.333333	24.04	7.1		0.000196611	1.19517	0.0434805	0.344785	2.99274	0.127885	0.00480484	0.288482	0.00402022	71.7562	4.31594	0.124927	0.0532224	-0.539881	-2.39575
2006-10-03		YD-36	1.02618									148	10.8			25.26	7.1											72.1004	4.17489	0.112434
2006-10-31	YD-38	YD-46	1.02874	0.018	49.6	<0.003	1.6	8.34	69.2	4	0.419	155	11		0.25	28.02	7.1		0.000131074	1.23759	0.0409228	0.343139	3.01014	0.124766	0.00478201	0.277265	0.00386398	70.9763	4.37236	0.114517		-0.557105	-2.41296
2006-11-30	YD-48	YD-49	1.02652	0.015	51.7	0.004	1.7	8.68	75.2	4	0.434	166.143			0.25	29.25	7.1		0.000109228	1.28998	0.0434805	0.357128	3.27113	0.124766	0.00495321	0.276847	0.00383974	71.2052	4.68669			-0.55776	-2.4157
2007-01-03	YD-64	YD-62	1.02	0.026	57	<0.003	1.8	8.84	79	4.2	0.449	164.992				29.45	7.1		0.000189329	1.42223	0.0460382	0.363711	3.43643	0.131004	0.0051244	0.255734	0.00360308	70.1326	4.65422			-0.592212	-2.44333
2007-02-06	YD-47	YD-72	1.02546	0.023	60.2	<0.003	1.7	8.75	75.5	4.1	0.443	168.77					7.1		0.000167483	1.50207	0.0434805	0.360008	3.28418	0.127885	0.00505592	0.239675	0.00336597	70.5398	4.76078			-0.620378	-2.47289
2007-03-02	YD-55	YD-54	1.02308	0.017	58.8	<0.003	1.8	8.91	77.6	4.2	0.458	167.898			0.2	33.22	7.1		0.000123792	1.46714	0.0460382	0.366591	3.37553	0.131004	0.00522712	0.249868	0.0035628	71.6342	4.7362			-0.602289	-2.44821
2007-04-04	YD-59	YD-58	1.01784	0.016	54.6	<0.003	1.8	9.04	79.8	4.2	0.462	183	13	4.2	0.2		7.1	1.44624	0.00011651	1.36234	0.0460382	0.37194	3.47123	0.131004	0.00527277	0.273015	0.00387037	72.955	5.1622	0.135338	0.0677376	-0.563814	-2.41225
2007-05-02	YD-65	YD-60	1.01768	0.013	57.1	<0.003	1.8	9.22	80.9	4.3	0.464	188	13	4	0.2		7.1		9.46646e-05	1.42472	0.0460382	0.379346	3.51907	0.134124	0.00529559	0.26626	0.00371693	72.3929	5.30324	0.135338	0.064512	-0.574695	-2.42982
2007-06-01	YD-70	YD-69	1.01649	0.012	56.8	<0.003	1.9	9.39	84.7	4.3	0.464	196	12	4	0.2		7.1		8.73827e-05	1.41724	0.0485958	0.38634	3.68437	0.134124	0.00529559	0.272601	0.00373656	70.7467	5.52891	0.124927	0.064512	-0.564472	-2.42753
2007-07-02		YD-83	1.01945	0.017	54.1	0.007	1.9	9.9	89.3	4.5	0.493				0.1				0.000123792	1.34987	0.0485958	0.407324	3.88447	0.140362	0.00562657	0.301751	0.00416824	70.744				-0.520352	-2.38005
2007-08-06	YD-85	YD-86	1.0214	0.018	57.2	<0.003	2.3	9.93	88.3	4.7	0.506	208	14	4.2	0.125		7.1		0.000131074	1.42722	0.0588265	0.408558	3.84097	0.1466	0.00577494	0.286262	0.00404629	70.2534	5.86742	0.145748	0.0677376	-0.543236	-2.39294
2007-10-03	YD-88	YD-80	1.013	0.017	58.1	<0.003	1.9	9.91	87.5	4.5	0.505	212	14	4.8	0.25				0.000123792	1.44967	0.0485958	0.407735	3.80617	0.140362	0.00576352	0.28126	0.00397574	70.74	5.98025	0.145748	0.0774144	-0.550892	-2.40058
2007-11-02	YD-87	YD-79	1.012	0.032	61.6	<0.003	2	10.27	91.5	4.6	0.527	227	14	16.9	0.2				0.00023302	1.537	0.0511535	0.422547	3.98016	0.143481	0.00601461	0.274916	0.00391321	70.2625	6.40339	0.145748	0.272563	-0.5608	-2.40747
2007-12-03	YD-95	YD-84	1.016	0.024	63.7	0.025	2.1	10.4	94.2	4.7	0.53	225	14	6.8	0.2				0.000174765	1.5894	0.0537112	0.427895	4.09761	0.1466	0.00604885	0.269218	0.00380574	71.4436	6.34697	0.145748	0.10967	-0.569896	-2.41956
2008-01-08	YD-99	YD-98	1.021									218	13	4.6	0.333333		7.1											71.9556	6.14951	0.135338	0.0741888
2008-02-07	YD-97	YD-89	1.013	0.021	72.2	<0.003	1.8	9.94	90.1	4.3	0.51	216	13	5.1	0.333333				0.00015292	1.80149	0.0460382	0.408969	3.91927	0.134124	0.00582059	0.227018	0.00323099	71.0463	6.09309	0.135338	0.0822528	-0.64394	-2.49066
2008-03-05	YD-94	YD-91	1.012	0.02	69.7	<0.003	1.8	9.79	87.9	4.2	0.494	217	13	4.5	0.5				0.000145638	1.73911	0.0460382	0.402798	3.82357	0.131004	0.00563798	0.231612	0.00324188	72.5694	6.1213	0.135338	0.072576	-0.63524	-2.4892
2008-04-03	YD-92	YD-100	1.024	0.017	68.2	<0.003	3.4	9.94	90	4.4	0.498	222	13	7.4	0.33				0.000123792	1.70168	0.086961	0.408969	3.91492	0.137243	0.00568363	0.240332	0.00334001	73.719	6.26234	0.135338	0.119347	-0.619188	-2.47625
2008-05-30	YD-106	YD-90	1.023	0.018	66.6	<0.003	2.4	10.11	94.1	4.8	0.513	225	15	13.5	0.5				0.000131074	1.66176	0.0613842	0.415964	4.09326	0.149719	0.00585483	0.250315	0.00352327	73.4869	6.34697	0.156159	0.217728	-0.601513	-2.45305
2008-06-25	YD-96	YD-101	1.02									234	14	6.5	0.33			8.35068										65.5067	6.60085	0.145748	0.104832
2008-08-12	YD-104	YD-110	1.021	0.015	61.6	0.006	2.1	10.83	102	4.7	0.538	246	14	5	0.25			12.8129	0.000109228	1.537	0.0537112	0.445587	4.4369	0.1466	0.00614015	0.289907	0.00399489	68.8006	6.93935	0.145748	0.08064	-0.537742	-2.3985
2008-09-02	YD-103	YD-102	1.02									245	14	5.6	0.25			11.2238										70.019	6.91114	0.145748	0.0903168
2008-10-30	YD-105	YD-93	0.984672	0.014	61.4	<0.003	2	10.02	93.7	4.3	0.49	227	13	4.1				6.04903	0.000101946	1.53201	0.0511535	0.412261	4.07586	0.134124	0.00559233	0.269098	0.00365032	71.7842	6.40339	0.135338	0.0661248	-0.57009	-2.43767
2008-12-02	YD-109	YD-108	1.027	0.013	62	<0.003	1.9	10.07	94.4	4.3	0.494	228	13	4.1				4.41982	9.46646e-05	1.54698	0.0485958	0.414318	4.10631	0.134124	0.00563798	0.267823	0.0036445		6.43159	0.135338	0.0661248	-0.572152	-2.43836
2008-12-30		YD-77	1.022									220	12.1		0.5			3.0555											6.20592	0.125968	0
2009-03-05	YD-108x	YD-107		0.014	71.1	<0.006	2.35	9.14	93.2	4.7	0.503	230	14	8.1	0.8			2.17388	0.000101946	1.77404	0.0601054	0.376054	4.05411	0.1466	0.0057407	0.211976	0.00323595		6.48801	0.145748	0.130637	-0.673713	-2.49
2009-05-13	YD-201											209	12.2		0.75			1.96911											6.19718	0.127009	0
2009-09-09												211	13.6		0.33			11.0936											5.95205	0.141584	0
2009-11-09												223	14.8		0.75			11.3252											6.29055	0.154077	0
2010-04-05		YD-Z3		0.011	56.5	<0.006	1.84	8.34	92.4	5.15	0.437				0.75				8.01008e-05	1.40975	0.0470612	0.343139	4.01931	0.160636	0.00498745	0.243404	0.00353782				0	-0.613672	-2.45126
2010-06-01		YD-Z5		0.011	49.1	<0.006	1.89	8.41	95.5	5.37	0.433	174	14		0.5			6.88491	8.01008e-05	1.22511	0.0483401	0.346019	4.15416	0.167498	0.00494179	0.282439	0.00403375		4.90832	0.145748	0	-0.549075	-2.39429
2010-08-05		YD-Z4		0.011	42.6	<0.006	2.1	9.08	97.8	6.01	0.456				0.375				8.01008e-05	1.06293	0.0537112	0.373586	4.25421	0.187461	0.00520429	0.351469	0.00489619				0	-0.454113	-2.31014
2010-04-06		YD-Z2																													0
2010-10-06		YD-Z6		0.012	52.7			10.5				218	21.1	11.9	0.25			19.1739	8.73827e-05	1.31494		0.43201							6.14951	0.219664	0.191923
2011-01-17		YD-Z7		0.013	64.2			8.46				170	17.7	9.85	0.2			10.4545	9.46646e-05	1.60188		0.348077							4.79549	0.184268	0.158861
2011-03-02		YD-Z8		0.012	45.9			9.69				203	18.9	8.46	0.17			6.96626	8.73827e-05	1.14527		0.398683							5.72638	0.19676	0.136443
																															0
																			median	1.41724	0.0460382	0.366591			0.00516435				5.98025	0.135338
																			stdev	0.198	0.0088572	0.0447123			0.000546338				0.864022	0.0230462

## Sheet: DR Table 2) Dripwater_isotopes
A)	IRMS Method Data at Australian National University					B)	CRDS Method at ANSTO
	Site 1a		Site 2a				Site 2a
	Date	d18O	Date 2a	d18O			Date	d18O	2H
	2005-08-19	-3.29304	2005-09-01	-2.99357			2007-04-04	-1.93	1.44624
	2005-09-01	-3.4078	2005-10-03	-3.1721			2008-06-25	-1.12	8.35068
	2005-10-03	-3.21964	2005-11-02	-2.80165			2008-08-12	-0.55	12.8129
	2005-11-02	-3.64268	2005-12-02	-2.82672			2008-09-02	-0.76	11.2238
	2005-12-02	-3.75501	2006-01-04				2008-10-30	-1.09	6.04903
	2006-01-04	-3.5648	2006-02-01				2008-12-02	-1.42	4.41982
	2006-02-01	-3.46755	2006-02-28	-3.0843			2008-12-30	-1.6	3.0555
	2006-02-28	-3.47359	2006-04-04	-2.99672			2009-03-05	-1.07	2.17388
	2006-04-04	-3.45783	2006-05-03	-2.4339			2009-05-13	-1.84	1.96911
	2006-05-03	-3.55602	2006-05-31	-2.1483			2009-09-09	-0.75	11.0936
	2006-05-31	-3.20409	2006-07-05	-1.60581			2009-11-09	-0.48	11.3252
	2006-07-05	-2.92456	2006-08-02	-1.58866			2010-06-01	-1.2	6.88491
	2006-08-02	-2.98964	2006-09-05	-1.95052			2010-10-06	0.79	19.1739
	2006-09-05	-3.11529	2006-10-03	-1.86397			2011-01-17	-0.61	10.4545
	2006-10-03	-4.27095	2006-10-31	-1.36172			2011-03-02	-1.12	6.96626
	2006-10-31	-2.95681	2006-11-30	-1.47919
	2006-11-30	-2.85303	2007-01-03	-1.68927
	2007-01-03	-2.90605	2007-02-06
	2007-02-06		2007-03-02	-2.08936
	2007-03-02	-2.53029	2007-05-02	-1.6588
	2007-04-04		2007-06-01	-1.43192
	2007-05-02	-1.6886	2007-07-02
	2007-06-01	-1.097	2007-08-06	-0.75275
	2007-07-02	-0.106391	2007-10-03
	2007-08-06	1.03042	2007-11-02	-0.611385
			2007-12-03	-0.982263
	Median	-3.20409	2008-01-08	-1.0402
		1.23494	2008-02-07	-1.44971
			2008-03-05	-2.18124
			2008-04-03	-2.0225
			2008-05-30	-1.19884
			Median	-1.47919
				0.835663

## Sheet: Drip_calc_s1a
Site 1a
Date	Total volume recorded	Drip interval (min:sec)	Drip interval (s)	Total #drips per week	Total discharge per week (ml)	Tot discharge estimated from bottles (ml)
2005-08-19
2005-09-01	0.5	12.38	758	211.685	48.6875	72.0865
2005-10-03	1	12.52	772	511.621	117.673	98.507
2005-11-02	1	13.18	798	464.017	106.724	98.507
2005-12-02	1	17.28	1048	353.326	81.265	98.507
2006-01-04	1	18.1	1081	376.794	86.6626	98.507
2006-02-01	0.8	12.36	756	457.143	105.143	87.9388
2006-02-28	0.75	16.31	991	336.284	77.3453	85.2968
2006-04-04	0.5	17.2	1022	422.701	97.2211	72.0865
2006-05-03	0.75	18.3	1083	330.51	76.0174	85.2968
2006-07-05		6.22	382	2035.6	468.188
2006-08-02		8.41	521	663.34	152.568
2006-09-05		8.42	522	803.941	184.906
2006-10-03		9.22	562	614.947	141.438
2006-10-31		10.04	604	572.185	131.603
2006-11-30		10.04	604	613.056	141.003
2007-01-03		10.2	602	697.105	160.334
2007-02-06
2007-03-01	0.25					58.8762
2007-04-01	0.166667					54.4728
2007-05-02	0.166667					54.4728
2007-06-01	0.125					52.2711
					Median ml/wk	85.2968					9.2
					Sd	18.465
					median ml/day	12.1852
					Sd ml/day	2.63786

## Sheet: Drip_calc_site2a
Site - 2a	Bottle lvl (fraction of ~500ml)	Drip interval time (min:sec)	Drip interval (sec)	Total #drips since last collection	Total discharge per week (ml)	Total discharge per week estimated from the bottles (ml)	Total discharge / week (ml)			/wk	/day
2005-09-01	0.5					70.395	70		median	43	6.14286
2005-10-03	0.75					110.095	110		sd	33.2983	4.7569
2005-11-02	0.8					118.035	118
2005-12-02	0.5					70.395	70
2006-01-04	0.75					110.095	110
2006-02-01	0.5					70.395	70
2006-02-28	0.5					70.395	70
2006-04-04	0.8					118.035	118
2006-05-03	0.3					38.635	38
2006-05-31
2006-07-05		21.35	1295	333.591	50.0386		50
2006-08-02		20.18	1218	283.744	42.5616		42
2006-09-05	0.333333	24.04	1444	290.621	43.5932	43.9283	43
2006-10-03		25.26	1526	226.474	33.9712		33
2006-10-31	0.25	28.02	1682	205.47	30.8205	30.695	31
2006-11-30	0.25	29.25	1765	209.794	31.469	30.695	31
2007-01-03		29.45	1785	235.102	35.2653		35
2007-02-06
2007-03-02	0.2	33.22	2002	147.966	22.1949	22.755	22
2007-04-04	0.2					22.755	22
2007-05-02	0.2					22.755	22
2007-06-01	0.2					22.755	22
2007-07-02	0.1					6.875	7
2007-08-06	0.125					10.845	11
2007-10-03	0.25					30.695	30
2007-11-02	0.2					22.755	22
2007-12-03	0.2					22.755	22
2008-01-08	0.333333					43.9283	44
2008-02-07	0.333333					43.9283	44
2008-03-05	0.5					70.395	70
2008-04-03	0.33					43.399	43
2008-05-30	0.5					70.395	70
2008-06-25	0.33					43.399	43
2008-08-12	0.25					30.695	31
2008-09-02	0.25					30.695	31
2008-10-30
2008-12-02
2008-12-30	0.5					70.395	70.395
2009-03-05	0.8					118.035	118.035
2009-05-13	0.75					110.095	110.095
2009-09-09	0.33					43.399	43.399
2009-11-09	0.75					110.095	110.095
2010-04-05	0.75					110.095	110.095
2010-06-01	0.5					70.395	70.395
2010-08-05	0.375					50.545	50.545
2010-10-06	0.25					30.695	30.695
2011-01-17	0.2					22.755	22.755
2011-03-02	0.17					17.991	17.991

## Sheet: DR Table 3) Soil_Depth
Site1a - Wheat field/dead Tuart				Site 2a - Cathedral
Centre point (0) - S31º32.852´ E115º41.462´				Centre point (0) - S31º32.850´ E115º41.483´
Distance from center	Depth (mm)	Average depth (mm)		Distance from Center	Depth (mm)	Average depth (mm)
0	50	125.714		0	250	209.286
North 1.0m	140			North 1.0m	125
North 2.0m	100			North 2.0m	135
North 3.0m	150			North 3.0m	200
North 4.0m	120			North 4.0m	260
North 5.0m	190			North 5.0m	230
South 1.0m	0			South 1.0m	370
South 2.0m	60			South 2.0m	145
South 3.0m	0			South 3.0m	115
South 4.0m	190			South 4.0m	140
South 5.0m	375			South 5.0m	270
East 1.0m	80			East 1.0m	150
East 2.0m	60			East 2.0m	50
East 3.0m	200			East 3.0m	30
East 4.0m	180			East 4.0m	45
East 5.0m	235			East 5.0m	190
West 1.0m	150			West 1.0m	400
West 2.0m	40			West 2.0m	320
West 3.0m	90			West 3.0m	200
West 4.0m	40			West 4.0m	370
West 5.0m	190			West 5.0m	400

## Sheet: Awap_balance
Date	FEW/AET	PRECIP	HEP	Month	Mean monthly HEP	Date_AWAP	CUMSUM Precip - FEW
2000-01-02	46.9898	54.1	7.11016	January	-16.8463	2000-01-02	23.9565
2000-02-01	47.17	0.1	-47.0699	February	-9.8776	2000-02-01	-13.2359
2000-03-02	44.4354	43.2	-1.23535	March	-3.84048	2000-03-02	-10.6308
2000-04-02	36.0864	29.3	-6.78639	April	0.993786	2000-04-02	-18.4109
2000-05-02	42.4238	24.5	-17.9238	May	45.3475	2000-05-02	-81.6823
2000-06-02	34.4835	86.6001	52.1166	June	34.5266	2000-06-02	-64.0923
2000-07-02	38.5562	146.3	107.744	July	71.4148	2000-07-02	-27.7632
2000-08-02	54.0953	100.1	46.0046	August	27.864	2000-08-02	-9.6226
2000-09-02	83.1516	36.0999	-47.0517	September	-26.1624	2000-09-02	-30.5119
2000-10-02	102.496	5.1	-97.3956	October	-57.0091	2000-10-02	-70.8984
2000-11-02	44.2998	8.79999	-35.4998	November	-34.912	2000-11-02	-71.4862
2000-12-02	26.5705	45.348	18.7775	December	-17.9461	2000-12-02	-34.7626
2001-01-02	18.7679	5.2	-13.5679	January	-16.8463	2001-01-02	-31.4842
2001-02-01	17.2736	2.3	-14.9736	February	-9.8776	2001-02-01	-36.5802
2001-03-02	20.2687	7.7	-12.5687	March	-3.84048	2001-03-02	-45.3084
2001-04-02	14.9364	1.2	-13.7364	April	0.993786	2001-04-02	-60.0386
2001-05-02	25.4204	100.2	74.7797	May	45.3475	2001-05-02	-30.6065
2001-06-02	41.3055	30.9999	-10.3056	June	34.5266	2001-06-02	-75.4387
2001-07-02	42.4455	143.8	101.355	July	71.4148	2001-07-02	-45.499
2001-08-02	61.101	87.8001	26.6991	August	27.864	2001-08-02	-46.664
2001-09-02	70.1742	91.8999	21.7257	September	-26.1624	2001-09-02	1.22415
2001-10-02	103.612	25.7	-77.9116	October	-57.0091	2001-10-02	-19.6784
2001-11-02	74.3448	20	-54.3448	November	-34.912	2001-11-02	-39.1111
2001-12-02	41.5663	44.2323	2.666	December	-17.9461	2001-12-02	-18.4991
2002-01-02	21.3849	3.49999	-17.8849	January	-16.8463	2002-01-02	-19.5377
2002-02-01	16.8018	4.2	-12.6018	February	-9.8776	2002-02-01	-22.2618
2002-03-02	13.9929	1.4	-12.5929	March	-3.84048	2002-03-02	-31.0142
2002-04-02	22.0613	57.8001	35.7388	April	0.993786	2002-04-02	3.73078
2002-05-02	38.1802	45.6999	7.51967	May	45.3475	2002-05-02	-34.0971
2002-06-02	34.7988	111.1	76.3011	June	34.5266	2002-06-02	7.67738
2002-07-02	41.4331	97.8999	56.4668	July	71.4148	2002-07-02	-7.27064
2002-08-02	61.292	73.3001	12.0082	August	27.864	2002-08-02	-23.1265
2002-09-02	83.4891	42.0999	-41.3892	September	-26.1624	2002-09-02	-38.3533
2002-10-02	91.8539	33.9001	-57.9539	October	-57.0091	2002-10-02	-39.298
2002-11-02	51.3642	10.5	-40.8642	November	-34.912	2002-11-02	-45.2502
2002-12-02	24.6462	41.2768	16.6306	December	-17.9461	2002-12-02	-10.6736
2003-01-02	16.1457	0	-16.1457	January	-16.8463	2003-01-02	-9.97295
2003-02-01	17.391	17.5	0.108976	February	-9.8776	2003-02-01	0.013624
2003-03-02	19.3285	40.4999	21.1714	March	-3.84048	2003-03-02	25.0255
2003-04-02	42.3753	34.2	-8.1753	April	0.993786	2003-04-02	15.8564
2003-05-02	38.6511	83.5	44.8489	May	45.3475	2003-05-02	15.3578
2003-06-02	38.6019	116.5	77.898	June	34.5266	2003-06-02	58.7292
2003-07-02	43.6837	102.3	58.6163	July	71.4148	2003-07-02	45.9307
2003-08-02	60.7696	114.8	54.0305	August	27.864	2003-08-02	72.0972
2003-09-02	80.9628	81	0.0372	September	-26.1624	2003-09-02	98.2969
2003-10-02	111.3	15.5	-95.7999	October	-57.0091	2003-10-02	59.506
2003-11-02	67.8267	23.1	-44.7267	November	-34.912	2003-11-02	49.6914
2003-12-02	37.9493	1.4	-36.5493	December	-17.9461	2003-12-02	31.0882
2004-01-02	30.6037	15.3	-15.3037	January	-16.8463	2004-01-02	32.6308
2004-02-01	18.3345	1.8	-16.5345	February	-9.8776	2004-02-01	25.9738
2004-03-02	16.2405	2.1	-14.1405	March	-3.84048	2004-03-02	15.6738
2004-04-02	15.0926	4.70001	-10.3926	April	0.993786	2004-04-02	4.2874
2004-05-02	29.4249	121.6	92.1751	May	45.3475	2004-05-02	51.115
2004-06-02	32.3328	107.9	75.5673	June	34.5266	2004-06-02	92.1556
2004-07-02	48.9595	73.5001	24.5405	July	71.4148	2004-07-02	45.2813
2004-08-02	58.2524	108.1	49.8477	August	27.864	2004-08-02	67.265
2004-09-02	80.7855	37.8999	-42.8856	September	-26.1624	2004-09-02	50.5418
2004-10-02	96.6667	26.8	-69.8667	October	-57.0091	2004-10-02	37.6842
2004-11-02	58.3575	24.6	-33.7575	November	-34.912	2004-11-02	38.8388
2004-12-02	38.002	45.0008	6.99887	December	-17.9461	2004-12-02	63.7837
2005-01-02	23.1649	0.1	-23.0649	January	-16.8463	2005-01-02	57.5651
2005-02-01	14.0619	1.8	-12.2619	February	-9.8776	2005-02-01	55.1808
2005-03-02	16.0106	17.8	1.78938	March	-3.84048	2005-03-02	60.8106
2005-04-02	35.9112	24.2	-11.7112	April	0.993786	2005-04-02	48.1057
2005-05-02	36.5065	139.2	102.693	May	45.3475	2005-05-02	105.452
2005-06-02	34.0521	163.3	129.248	June	34.5266	2005-06-02	200.173
2005-07-02	52.3054	41.5	-10.8054	July	71.4148	2005-07-02	117.952
2005-08-02	57.076	110.4	53.324	August	27.864	2005-08-02	143.413
2005-09-02	79.4877	68.0001	-11.4876	September	-26.1624	2005-09-02	158.087
2005-10-02	91.8139	35.4001	-56.4138	October	-57.0091	2005-10-02	158.683
2005-11-02	75.7473	9.39999	-66.3473	November	-34.912	2005-11-02	127.247
2005-12-02	40.9882	52.4027	11.4145	December	-17.9461	2005-12-02	156.608
2006-01-02	58.0078	80.1	22.0921	January	-16.8463	2006-01-02	195.546
2006-02-01	50.0968	12.7	-37.3967	February	-9.8776	2006-02-01	168.027
2006-03-02	30.4968	0.3	-30.1968	March	-3.84048	2006-03-02	141.671
2006-04-02	24.7294	18.1	-6.62937	April	0.993786	2006-04-02	134.048
2006-05-02	30.3321	30	-0.332072	May	45.3475	2006-05-02	88.3681
2006-06-02	37.5327	28.9	-8.63271	June	34.5266	2006-06-02	45.2088
2006-07-02	38.7729	67.7	28.927	July	71.4148	2006-07-02	2.72097
2006-08-02	56.7849	89.7999	33.015	August	27.864	2006-08-02	7.87196
2006-09-02	82.7577	65.4999	-17.2578	September	-26.1624	2006-09-02	16.7766
2006-10-02	83.2183	18	-65.2183	October	-57.0091	2006-10-02	8.56742
2006-11-02	34.9161	16.1	-18.8161	November	-34.912	2006-11-02	24.6634
2006-12-02	22.6507	36.8773	14.2266	December	-17.9461	2006-12-02	56.836
2007-01-02	19.4098	11.8	-7.60985	January	-16.8463	2007-01-02	66.0725
2007-02-01	10.2528	1.4	-8.85279	February	-9.8776	2007-02-01	67.0973
2007-03-02	11.1772	5.7	-5.4772	March	-3.84048	2007-03-02	65.4605
2007-04-02	15.5711	34.2	18.6289	April	0.993786	2007-04-02	83.0957
2007-05-02	33.6849	48.0999	14.415	May	45.3475	2007-05-02	52.1631
2007-06-02	34.9746	52.1001	17.1255	June	34.5266	2007-06-02	34.762
2007-07-02	35.2919	124.5	89.2081	July	71.4148	2007-07-02	52.5553
2007-08-02	59.8288	83.3001	23.4713	August	27.864	2007-08-02	48.1626
2007-09-02	78.3642	56.6001	-21.7641	September	-26.1624	2007-09-02	52.5609
2007-10-02	93.0254	25.8	-67.2254	October	-57.0091	2007-10-02	42.3446
2007-11-02	44.007	2	-42.007	November	-34.912	2007-11-02	35.2496
2007-12-02	38.1762	41.6928	3.51664	December	-17.9461	2007-12-02	56.7123
2008-01-02	26.4909	0	-26.4909	January	-16.8463	2008-01-02	47.0678
2008-02-01	25.5515	25.5	-0.051504	February	-9.8776	2008-02-01	56.8939
2008-03-02	15.8783	15.5	-0.378262	March	-3.84048	2008-03-02	60.3561
2008-04-02	30.9888	47.4	16.4112	April	0.993786	2008-04-02	75.7735
2008-05-02	36.2213	52.5001	16.2787	May	45.3475	2008-05-02	46.7047
2008-06-02	36.1443	80.9001	44.7558	June	34.5266	2008-06-02	56.9338
2008-07-02	34.4395	169.3	134.861	July	71.4148	2008-07-02	120.38
2008-08-02	73.5878	19.4	-54.1878	August	27.864	2008-08-02	38.3277
2008-09-02	74.3175	55.8999	-18.4176	September	-26.1624	2008-09-02	46.0726
2008-10-02	86.4351	53.0001	-33.435	October	-57.0091	2008-10-02	69.6466
2008-11-02	69.549	33.6	-35.949	November	-34.912	2008-11-02	68.6096
2008-12-02	44.9931	47.4656	2.47256	December	-17.9461	2008-12-02	89.0283
2009-01-02	18.4919	0	-18.4919	January	-16.8463	2009-01-02	87.3827
2009-02-01	17.1046	13.4	-3.70462	February	-9.8776	2009-02-01	93.5556
2009-03-02	13.3756	4.99999	-8.37558	March	-3.84048	2009-03-02	89.0205
2009-04-02	13.819	10.5	-3.31905	April	0.993786	2009-04-02	84.7077
2009-05-02	18.3125	37.5999	19.2874	May	45.3475	2009-05-02	58.6475
2009-06-02	28.6678	114.3	85.6322	June	34.5266	2009-06-02	109.753
2009-07-02	43.2713	122.8	79.5286	July	71.4148	2009-07-02	117.867
2009-08-02	61.4417	112	50.5582	August	27.864	2009-08-02	140.561
2009-09-02	74.0445	63.6999	-10.3446	September	-26.1624	2009-09-02	156.379
2009-10-02	98.6544	13.3	-85.3544	October	-57.0091	2009-10-02	128.034
2009-11-02	68.7192	36.0999	-32.6193	November	-34.912	2009-11-02	130.326
2009-12-02	39.445	45.1242	5.6792	December	-17.9461	2009-12-02	153.952
2010-01-02	18.8959	0.2	-18.6959	January	-16.8463	2010-01-02	152.102
2010-02-01	11.0114	0.799999	-10.2114	February	-9.8776	2010-02-01	151.768
2010-03-02	24.1709	58.3002	34.1293	March	-3.84048	2010-03-02	189.738
2010-04-02	40.4313	12.2	-28.2313	April	0.993786	2010-04-02	160.513
2010-05-02	33.4127	72.1999	38.7872	May	45.3475	2010-05-02	153.953
2010-06-02	34.8801	40.8	5.9199	June	34.5266	2010-06-02	125.346
2010-07-02	40.327	77.1999	36.8729	July	71.4148	2010-07-02	90.8039
2010-08-02	58.4765	65.9001	7.42357	August	27.864	2010-08-02	70.3635
2010-09-02	90.9696	27.9	-63.0696	September	-26.1624	2010-09-02	33.4563
2010-10-02	53.9186	5.90001	-48.0186	October	-57.0091	2010-10-02	42.4468
2010-11-02	21.0353	8.30001	-12.7353	November	-34.912	2010-11-02	64.6235
2010-12-02	14.6631	32.0872	17.424	December	-17.9461	2010-12-02	99.9936
2011-01-02	12.3289	6.49999	-5.8289	January	-16.8463	2011-01-02	111.011
2011-02-01	11.9056	9.8	-2.1056	February	-9.8776	2011-02-01	118.783
2011-03-02	14.6343	6.09999	-8.5343	March	-3.84048	2011-03-02	114.089
2011-04-02	12.7394	17.7	4.96062	April	0.993786	2011-04-02	118.056
2011-05-02	24.748	63.7999	39.0518	May	45.3475	2011-05-02	111.76
2011-06-02	30.9258	85.4001	54.4743	June	34.5266	2011-06-02	131.708
2011-07-02	35.903	122.8	86.897	July	71.4148	2011-07-02	147.19
2011-08-02	67.5676	90.9999	23.4323	August	27.864	2011-08-02	142.758
2011-09-02	75.018	56.7	-18.318	September	-26.1624	2011-09-02	150.603
2011-10-02	88.5825	47.9	-40.6825	October	-57.0091	2011-10-02	166.929
2011-11-02	76.0419	24	-52.0419	November	-34.912	2011-11-02	149.8
2011-12-02	55.8753	38.0001	-17.8752	December	-17.9461	2011-12-02	149.87
2012-01-02	32.3925	14.3	-18.0925	January	-16.8463	2012-01-02	148.624
2012-02-01	55.0171	56.5001	1.48306	February	-9.8776	2012-02-01	159.985
2012-03-02	25.6269	0.1	-25.5269	March	-3.84048	2012-03-02	138.298
2012-04-02	16.8621	27.2	10.3379	April	0.993786	2012-04-02	147.643
2012-05-02	36.0567	21.6	-14.4567	May	45.3475	2012-05-02	87.8383
2012-06-02	28.8171	119.2	90.3828	June	34.5266	2012-06-02	143.695
2012-07-02	46.8664	26.8	-20.0664	July	71.4148	2012-07-02	52.2133
2012-08-02	61.7126	80.9001	19.1875	August	27.864	2012-08-02	43.5367
2012-09-02	85.4778	66.6999	-18.7779	September	-26.1624	2012-09-02	50.9212
2012-10-02	70.7547	8.09999	-62.6547	October	-57.0091	2012-10-02	45.2756
2012-11-02	44.2128	54.6	10.3872	November	-34.912	2012-11-02	90.5748
2012-12-02	45.415	42.2651	-3.14991	December	-17.9461	2012-12-02	105.371
2013-01-02	36.6324	26.5	-10.1324	January	-16.8463	2013-01-02	112.085
2013-02-01	16.3658	1.5	-14.8658	February	-9.8776	2013-02-01	107.097
2013-03-02	27.8427	57.5	29.6573	March	-3.84048	2013-03-02	140.595
2013-04-02	32.0784	13.5	-18.5784	April	0.993786	2013-04-02	121.022
2013-05-02	35.9526	97.4001	61.4476	May	45.3475	2013-05-02	137.122
2013-06-02	37.3452	14.9	-22.4452	June	34.5266	2013-06-02	80.1506
2013-07-02	40.7548	93.8001	53.0453	July	71.4148	2013-07-02	61.7811
2013-08-02	57.5679	135.4	77.832	August	27.864	2013-08-02	111.749
2013-09-02	74.5488	95.0001	20.4513	September	-26.1624	2013-09-02	158.363
2013-10-02	108.171	24.5	-83.6714	October	-57.0091	2013-10-02	131.7
2013-11-02	54.0201	3	-51.0201	November	-34.912	2013-11-02	115.592
2013-12-02	24.1014	47.9099	23.8085	December	-17.9461	2013-12-02	157.347
2014-01-02	12.5154	5.7	-6.81541	January	-16.8463	2014-01-02	167.378
2014-02-01	11.9294	0.7	-11.2294	February	-9.8776	2014-02-01	166.026
