# Supplementary material for: A post-wildfire response in cave dripwater chemistry
Source: Copernicus journal article supplement (doi:10.5194/hess-2016-1), 2016-01-19
Supplement: Supplementary file 2 [file hess-2016-1-supplement.zip]

Archive with 2 entries (2 files):
- hess-2015-528-supplement-version1/DR_Geol_Tables.xlsx
- hess-2015-528-supplement-version1/Supp-Material_HESS_2015.pdf
